# Supplementary material
Source: MDPI journal article supplement (https://www.mdpi.com/2079-6412/11/7/788)
Supplement: s1 [file s1]

Archive with 8 entries (8 files):
- coatings-1214540-supplementary.pdf
- Video S1.wmv
- Video S2.wmv
- Video S3.wmv
- Video S4.wmv
- Video S5.wmv
- Video S6.wmv
- Video S7.wmv
